# Supplementary material for: Metagenomic Insight of a Full Scale Eco-Friendly Treatment System of Textile Dye Wastewater Using Bioaugmentation of the Composite Culture CES-1
Source: MDPI journal article supplement (doi:10.3390/microorganisms9071503), 2021-07-14
Supplement: s1 [file s1]

Table. S1. Collection coordinates and metagenomic samples from the textile dye wastewater plant

| Samples    | Total reads (bp) | GC(%) | AT(%) | Q20(%) | Q30(%) |
|------------|------------------|-------|-------|--------|--------|
| CES_1      | 27,241,698       | 54.28 | 36.44 | 97.68  | 92.18  |
| B_0303_17  | 31,658,964       | 64.17 | 37.65 | 97.38  | 93.25  |
| PA_0303_17 | 36,985,624       | 67.29 | 37.59 | 98.39  | 93.48  |
| SA_0303_17 | 37,658,742       | 67.54 | 37.42 | 93.46  | 94.61  |
| I_0629_17  | 39,028,159       | 63.24 | 35.91 | 94.65  | 95.48  |
| B_0629_17  | 43,645,559       | 67.51 | 36.18 | 94.06  | 91.26  |
| PA_0629_17 | 48,942,653       | 66.58 | 34.44 | 94.13  | 92.18  |
| SA_0629_17 | 45,451,628       | 66.04 | 37.52 | 96.56  | 93.37  |
| SD_0629_17 | 44,448,571       | 67.98 | 36.37 | 96.27  | 93.68  |
| I_0310_18  | 48,741,590       | 62.19 | 37.81 | 98.69  | 95.67  |
| B_0310_18  | 49,077,062       | 64.69 | 35.31 | 98.63  | 95.46  |
| PA_0310_18 | 49,372,460       | 59.77 | 40.23 | 98.61  | 95.46  |
| SA_0310_18 | 49,277,998       | 58.25 | 41.77 | 98.75  | 95.9   |
| SD_0310_18 | 49,514,724       | 54.81 | 45.18 | 98.48  | 95.26  |
| I_0713_18  | 36,995,260       | 61.84 | 38.16 | 96.65  | 91.33  |
| I_1026_18  | 34,172,512       | 60.51 | 39.49 | 94.54  | 91.26  |
| B_1026_18  | 38,293,276       | 63.25 | 36.75 | 94.51  | 91.06  |
| PA_1026_18 | 35,078,006       | 62.36 | 37.64 | 96.46  | 90.92  |
| SA_1026_18 | 34,662,952       | 62.63 | 37.37 | 96.65  | 91.35  |
| SD_1026_18 | 35,649,508       | 62.81 | 37.19 | 96.31  | 90.68  |

Table S2. Genes and enzymes responsible for the degradation of azo dyes and other chemicals in the textile dye wastewater

| Genes for pathways                           | Enzymes encoded by the genes                                                                 |
|----------------------------------------------|----------------------------------------------------------------------------------------------|
| <b>Azo and aromatic compound degradation</b> |                                                                                              |
| acpD                                         | acpD, azoR; FMN-dependent NADH-azoreductase [EC:1.7.1.17]                                    |
| ubiH                                         | ubiH; 2-octaprenyl-6-methoxyphenol hydroxylase                                               |
| nahAb                                        | nahAb, nagAb, ndoA, nbzAb, dntAb; naphthalene 1,2-dioxygenase ferredoxin component           |
| nahAc                                        | nahAc, ndoB, nbzAc, dntAc; naphthalene 1,2-dioxygenase subunit alpha                         |
| ndoR                                         | nahAa, nagAa, ndoR, nbzAa, dntAa; naphthalene 1,2-dioxygenase ferredoxin reductase component |
| THNR                                         | THNR; tetrahydroxynaphthalene reductase                                                      |
| nahF                                         | nahF; salicylaldehyde dehydrogenase                                                          |
| dmpB                                         | dmpB, xylE; catechol 2,3-dioxygenase                                                         |
| COMT                                         | COMT; catechol O-methyltransferase                                                           |
| catA                                         | catA; catechol 1,2-dioxygenase                                                               |
| catE                                         | catE; catechol 2,3-dioxygenase                                                               |
| mhqR                                         | mhqR; MarR family transcriptional regulator, 2-MHQ and catechol-resistance regulon repressor |
| pht4                                         | pht4; phthalate 4,5-cis-dihydrodiol dehydrogenase                                            |
| pht3                                         | pht3; phthalate 4,5-dioxygenase                                                              |
| pht2                                         | pht2; phthalate 4,5-dioxygenase reductase component                                          |
| pcaG                                         | pcaG; protocatechuate 3,4-dioxygenase, alpha subunit                                         |
| pcaH                                         | pcaH; protocatechuate 3,4-dioxygenase, beta subunit                                          |
| ligA                                         | ligA; protocatechuate 4,5-dioxygenase, alpha chain                                           |
| ligB                                         | ligB; protocatechuate 4,5-dioxygenase, beta chain                                            |
| padA                                         | padA; phenylacetyl-CoA:acceptor oxidoreductase accessory protein                             |
| padB                                         | padB; phenylacetyl-CoA:acceptor oxidoreductase                                               |
| vanA                                         | vanA; vanillate monooxygenase                                                                |
| vanB                                         | vanB; vanillate monooxygenase ferredoxin subunit                                             |
| <b>TCA_cycle</b>                             |                                                                                              |
| pfkA, PFK                                    | pfkA, PFK; 6-phosphofructokinase 1                                                           |
| ALDO                                         | ALDO; fructose-bisphosphate aldolase, class I                                                |
| FBA, fbaA                                    | FBA, fbaA; fructose-bisphosphate aldolase, class II                                          |
| TPI, tpiA                                    | TPI, tpiA; triosephosphate isomerase (TIM)                                                   |
| PGK, pgk                                     | PGK, pgk; phosphoglycerate kinase                                                            |
| PGAM, gpmA                                   | PGAM, gpmA; 2,3-bisphosphoglycerate-dependent phosphoglycerate mutase                        |
| ENO                                          | ENO, eno; enolase                                                                            |
| pyk                                          | PK, pyk; pyruvate kinase                                                                     |
| gltA                                         | CS, gltA; citrate synthase                                                                   |

|                               |                                                                                 |
|-------------------------------|---------------------------------------------------------------------------------|
| ACO2                          | ACO2; homoaconitase                                                             |
| IDH3                          | IDH3; isocitrate dehydrogenase (NAD <sup>+</sup> )                              |
| LSC1                          | LSC1; succinyl-CoA synthetase alpha subunit                                     |
| LSC2                          | LSC2; succinyl-CoA synthetase beta subunit                                      |
| sucD                          | sucD; succinyl-CoA synthetase alpha subunit                                     |
| sucC                          | sucC; succinyl-CoA synthetase beta subunit                                      |
| sdhA, frdA                    | sdhA, frdA; succinate dehydrogenase / fumarate reductase, flavoprotein subunit  |
| sdhB, frdB                    | sdhB, frdB; succinate dehydrogenase / fumarate reductase, iron-sulfur subunit   |
| mdh                           | mdh; malate dehydrogenase                                                       |
| MDH1                          | MDH1; malate dehydrogenase                                                      |
| MDH2                          | MDH2; malate dehydrogenase                                                      |
| <b>Fatty acid degradation</b> |                                                                                 |
| lipV                          | lipase                                                                          |
| fadE                          | acyl-CoA dehydrogenase                                                          |
| paaF, echA                    | enoyl-CoA hydratase                                                             |
| <b>Amino acid metabolism</b>  |                                                                                 |
| kgtP                          | kgtP; MFS transporter, MHS family, alpha-ketoglutarate permease                 |
| K10907                        | K10907; aminotransferase                                                        |
| dhaa                          | dhaa; 3-hydroxy-D-aspartate aldolase                                            |
| TDO2                          | TDO2, kynA; tryptophan 2,3-dioxygenase                                          |
| DDC                           | DDC, TDC; aromatic-L-amino-acid/L-tryptophan decarboxylase                      |
| ligK                          | ligK, galC; 4-hydroxy-4-methyl-2-oxoglutarate aldolase                          |
| serA                          | serA, PHGDH; D-3-phosphoglycerate dehydrogenase                                 |
| asd                           | asd; aspartate-semialdehyde dehydrogenase                                       |
| aspB                          | aspB; aspartate aminotransferase                                                |
| gltP                          | gltP, gltT; proton glutamate symport protein                                    |
| trpA                          | trpA; tryptophan synthase alpha chain                                           |
| trpB                          | trpB; tryptophan synthase beta chain                                            |
| <b>Nitrogen cycle</b>         |                                                                                 |
| pmoA                          | pmoA-amnA; methane/ammonia monooxygenase subunit A                              |
| hao                           | hao; hydroxylamine dehydrogenase                                                |
| nirS                          | nirS; nitrite reductase / hydroxylamine reductase                               |
| nirK                          | nirK; nitrite reductase                                                         |
| nosZ                          | nosZ; nitrous-oxide reductase                                                   |
| nifH                          | nifH; nitrogenase iron protein NifH                                             |
| narG, narZ, nxrA              | narG, narZ, nxrA; nitrate reductase / nitrite oxidoreductase, alpha subunit     |
| napA                          | napA; periplasmic nitrate reductase NapA                                        |
| NRT, narK, nrtP, nasA         | NRT, narK, nrtP, nasA; MFS transporter, NNP family, nitrate/nitrite transporter |
| nrfA                          | nrFA; nitrite reductase (cytochrome c-552)                                      |
| <b>Phosphorus cycle</b>       |                                                                                 |

|            |                                                         |
|------------|---------------------------------------------------------|
| phoA       | alkaline phosphatase                                    |
| phoD       | alkaline phosphatase D                                  |
| PHO        | acid phosphatase                                        |
| aphA       | kanamycin kinase                                        |
| appA       | 4-phytase / acid phosphatase                            |
| glpQ, ugpQ | glpQ, ugpQ; glycerophosphoryl diester phosphodiesterase |

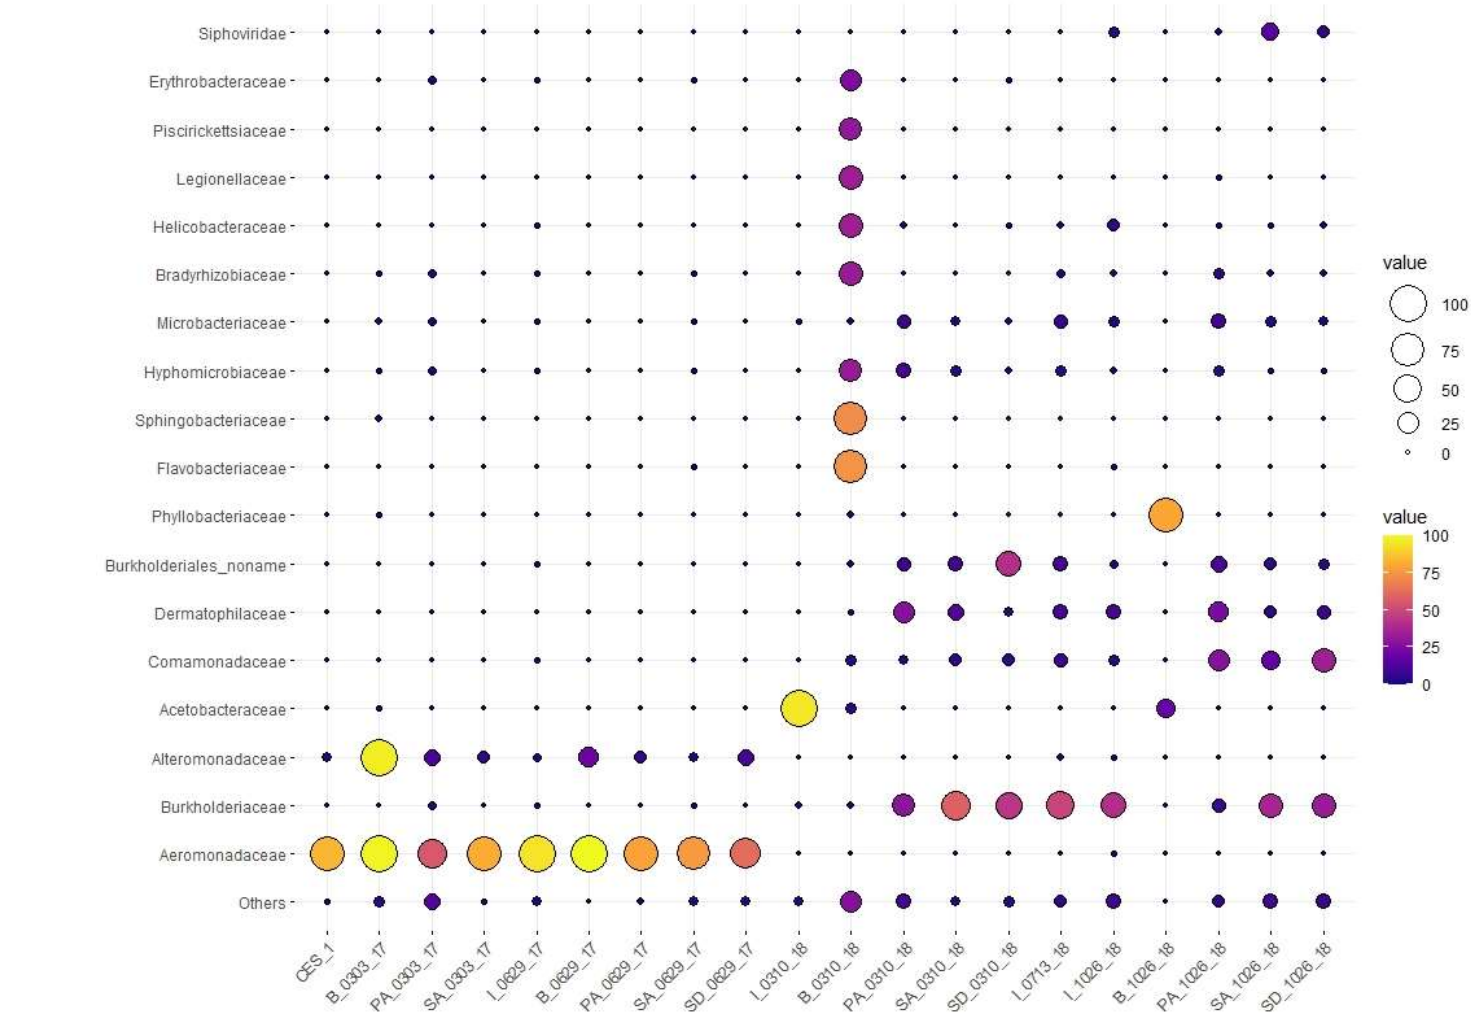

Figure S1. Changes in the abundance of the microbial communities over time at the family level after bioaugmentation of the complex microbial consortium CES-1

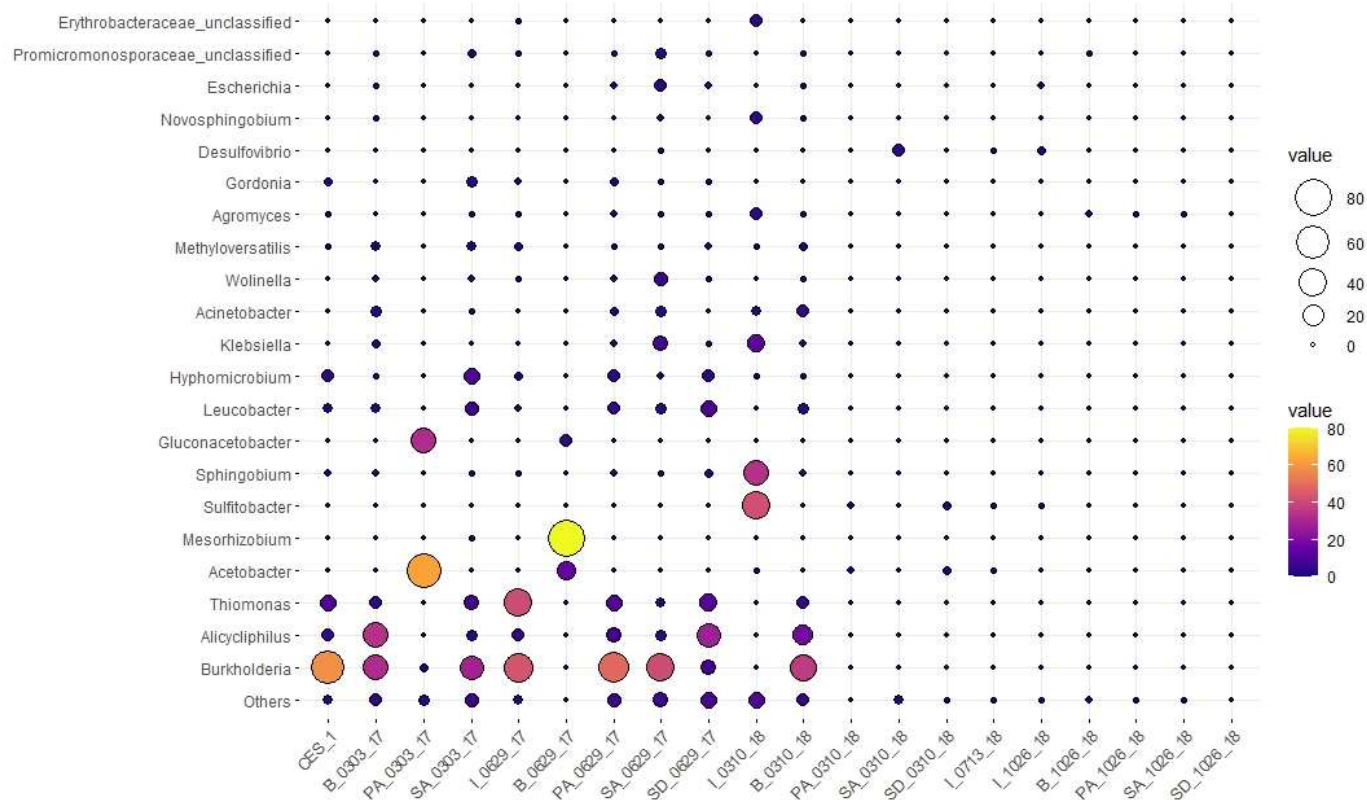

Figure S2. Changes in the abundance of the microbial communities over time at the genus level after bioaugmentation of the complex microbial consortium CES-1

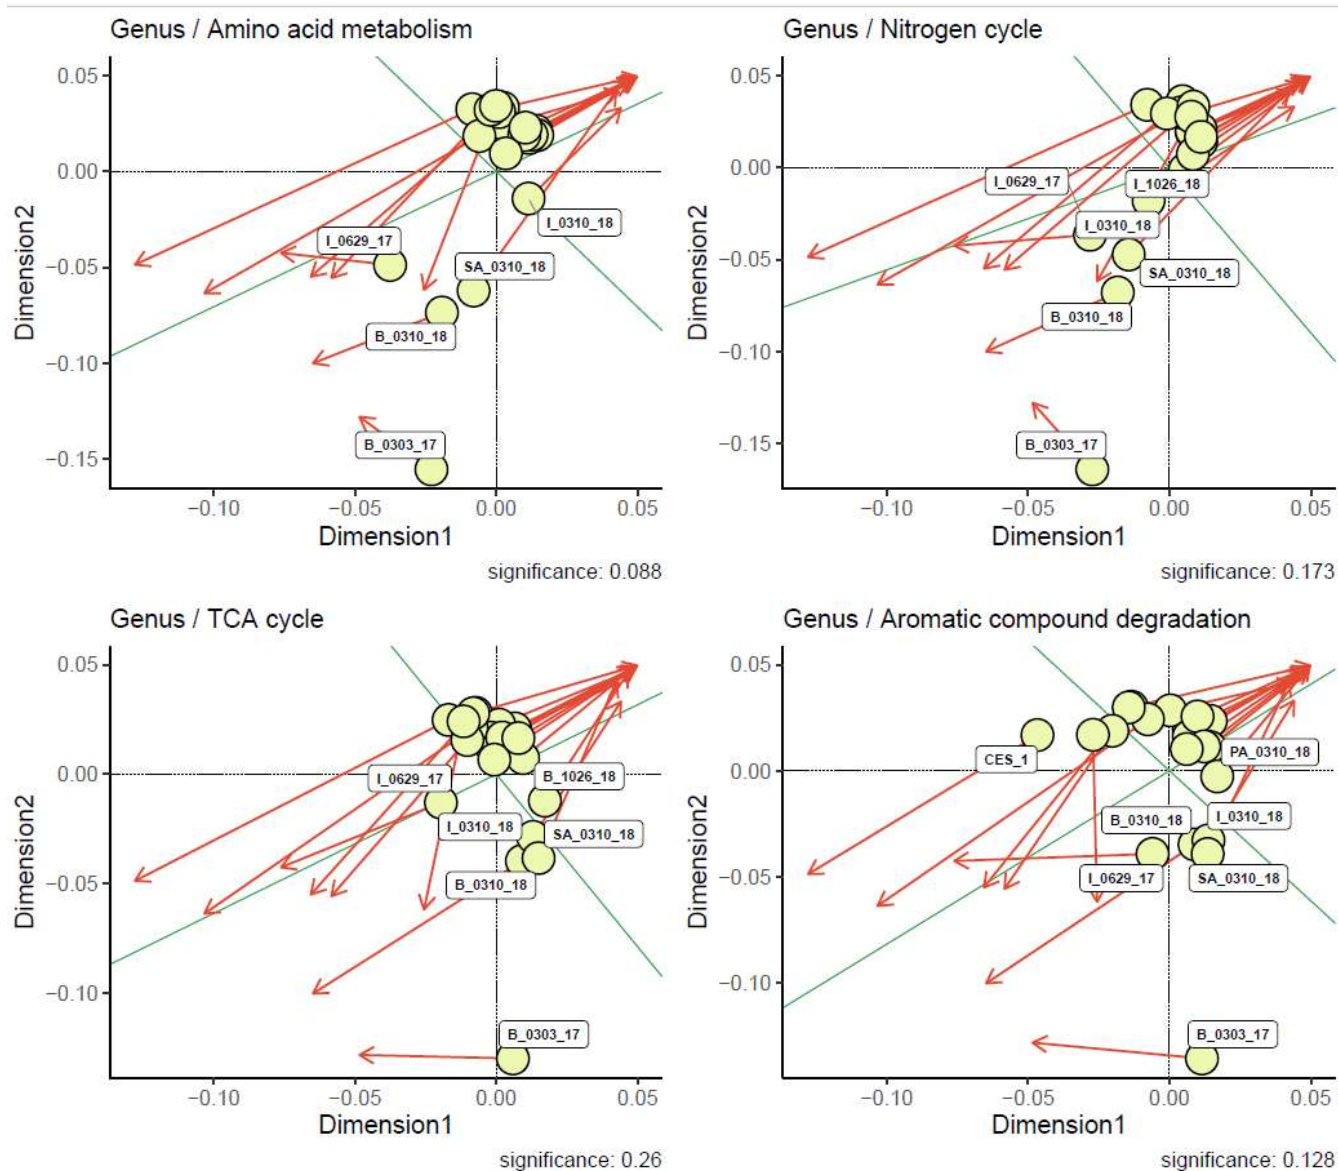

Figure S3. The Procrustes plot analysis of microbial community (Genus level) with different degradation pathways. The positive dimension is a nonnegative number, representing the credibility of the cluster results. Blue arrow indicates the significant positive correlation parameters ( $p < 0.05$ ).

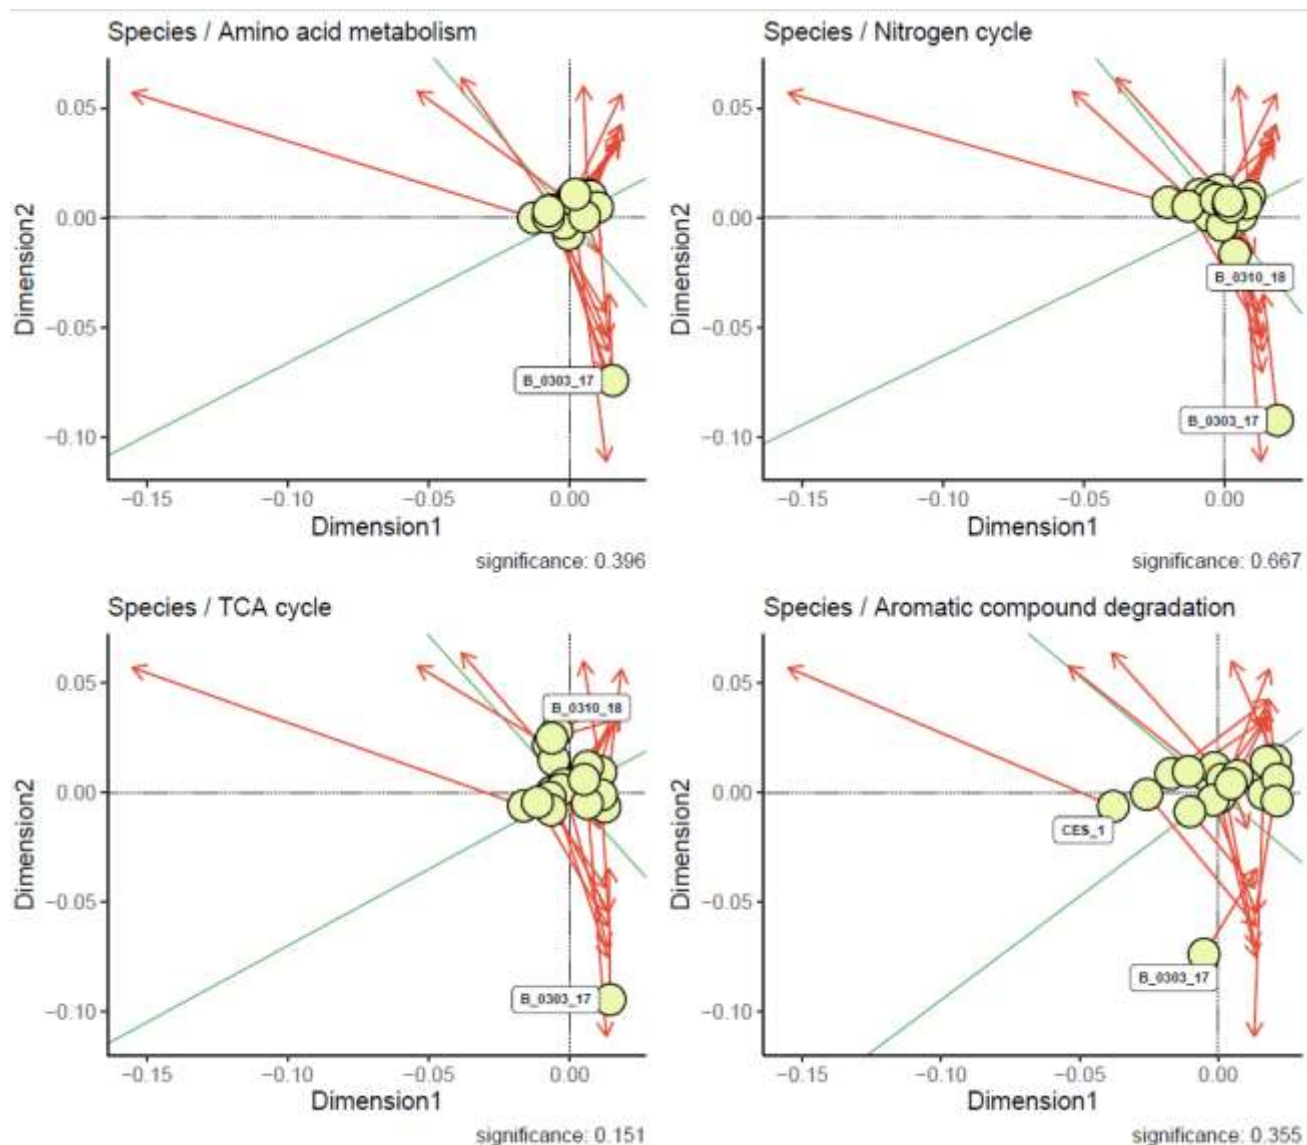

Figure S4. The Procrustes plot analysis of microbial community (species level) with different degradation pathways. The positive dimension is a nonnegative number, representing the credibility of the cluster results. Blue arrow indicates the significant positive correlation parameters ( $p < 0.05$ ).
